# Supplementary material
Source: PubMed Central journal article supplement (PMC11488678)
Supplement: NIHMS1993263-supplement-Supplemental_figure_1.pdf [file NIHMS1993263-supplement-Supplemental_figure_1.pdf]

188,294 FET Cycles (2014-2019) resulting in live birth

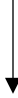

188,294 cycles evaluated for inclusion

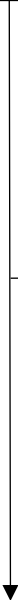

- Excluded
- 4564- missing birth weight
  - 867- gestational age at birth before 22 weeks or after 42 weeks
  - 46- missing gestational age
  - 57- weight greater than 5500 grams
  - 30- no live birth
  - 40- use of gestational carrier
  - 116- more than one infant delivered
  - 982- missing day of embryo cryopreservation

181,592 singleton FET cycle included in final analysis
